# Supplementary material for: Inhibition of influenza H5N1 invasion by modified heparin derivatives
Source: Royal Society of Chemistry journal article supplement (doi:10.1039/c4md00516c), 2014-12-23
Supplement: c4md00516c1.pdf [file c4md00516c1.pdf]

## Inhibition of Influenza H5N1 invasion by modified heparin derivatives

Mark A. Skidmore, <sup>a,b</sup> # Anna Kajaste-Rudnitski, <sup>c</sup> # Nicola M. Wells, <sup>a</sup> Scott E. Guimond, <sup>a</sup> Timothy R. Rudd, <sup>d,a</sup> Edwin A. Yates <sup>a</sup> § and Elisa Vicenzi <sup>e</sup> §

# Joint first authorship (authors contributed equally to this work)

§ Joint senior authorship

<sup>a</sup> Department of Biochemistry, Institute of Integrative Biology, University of Liverpool, Crown Street, Liverpool L69 7ZB United Kingdom. Fax: +44 (0)151 795 4404; Tel: +44 (0)151 795 4429; E-mail: eayates@liverpool.ac.uk

<sup>b</sup> School of Life Sciences, Keele University, Keele, Staffordshire, ST5 5BG United Kingdom. Tel: +44 (0)1782 733945; E-mail: m.a.skidmore@biol.keele.ac.uk

<sup>c</sup> San Raffaele Telethon Institute for Gene Therapy (TIGET), and Division of Regenerative Medicine, Stem Cells and Gene Therapy, Via Olgettina 58, Milan, Italy. E-mail: kajaste.anna@hsr.it

<sup>d</sup> Diamond Light Source Ltd, Diamond House, Harwell Science & Innovation Campus, Didcot, Oxfordshire OX11 0DE

<sup>e</sup> Viral Pathogens and Biosafety Unit, Division of Immunology, Transplantation and Infectious Diseases, San Raffaele Scientific Institute, Milano, Italy. Fax: +39 02 2643 4905; Tel: +39 02 2643 4908 vicenzi.elisa@hsr.it

### Contents:

S1. Chemical modifications of heparin

S2. Preparation of modified heparins

S3. Chemically modified heparin polysaccharide purity

S4. NMR characterisation of chemically modified heparin polysaccharides

S5. Heparin derivatives do not neutralise the VSVg-pseudotyped lentiviral vectors

## S1. Chemical modifications of heparin

**A. Selective de-N-sulfation** was achieved based on the method described by Inoue and Nagasawa [Inoue and Nagasawa, (1976)] using solvolytic de-sulfation by treatment of the pyridinium salt of the relevant heparin derivative with 9/1, v/v, DMSO/MeOH (60 ° C, 30 min).

**B. Selective 2-O-desulfation** in iduronate residues was using the method described by Jeseja *et al.*, (1989). Briefly, a solution of the heparin derivative is dissolved in 0.1 N NaOH, frozen and then freeze dried. The reaction proceeds via an intermediate epoxide, which is opened stereoselectively during the reaction in a concerted fashion to yield 2-de-O-sulfated iduronate residues.

**C. Selective 6-O-desulfation** was achieved using a modification of the procedure for complete desulfation described by Nagasawa *et al.*, (1977), but employing milder conditions. This is similar to the solvolytic de-sulfation procedure followed for selective de-N-sulfation (Inoue *et al.*, (1976)), but was conducted under harsher conditions [65 ° C, 4 h].

**D. Complete O- and N - desulfation** was achieved following the procedure of Nagasawa *et al.*, (1977). This is similar to the solvolytic de-sulfation procedure followed for selective de-N-sulfation (Inoue *et al.*, (1976)), but was conducted under harsher conditions [110 ° C, 24 h].

**E. Selective re-N-sulfation** of heparin derivatives bearing free-amino functions in their glucosamine residues was carried essentially out as described [Embrey *et al.*, (1971)] employing excess trimethylamine.sulfur trioxide complex in a saturated aqueous solution of sodium bicarbonate (55 ° C, 24 h).

**F. Selective re-N-acetylation** was carried out using standard procedures described previously [Yates *et al.* (1996)] employing excess acetic anhydride on the relevant de-N-sulfated heparin derivative in a saturated aqueous solution of sodium bicarbonate at 4 ° C for 2 h, followed by reaction for a further 16 h at room temperature.

**G. Per-sulfation** (complete O-sulfation) was achieved essentially as described [Yates *et al.*, (1996) & Yates *et al.*, (2000)] employing excess pyridine.sulfur trioxide complex on the tetramethylammonium salt of heparin in DMF reacted at 55 ° C for 24 h. This reaction resulted in extensive de-N-sulfation and re N-sulfation was then carried out as described [Embrey *et al.*, (1971)], taking care to avoid pH levels above 8, which can result in the formation of an aziridine derivative in 3-O-sulfated glucosamine residues [Yates *et al.*, (1997)].

## References

- K Nagasawa, Y Inoue and T Kamata. Solvolytic de-sulfation of glycosaminoglycan sulfates with dimethyl sulfoxide. *Carbohydr. Res.*, (1977) 58, 47-55.
- M Jeseja, RN Rej, F Sauriol and AS Perlin. Novel regio- and stereoelective modifications of heparin in alkaline solution. Nuclear magnetic resonance spectroscopic evidence. *Can. J. Chem.*, (1989) 67, 1449-56
- Y Inoue and K. Nagasawa. Selective de N-sulfation of heparin with dimethyl sulfoxide. *Carbohydr. Res.*, (1976) 46, 87-95
- G Embrey, AG Lloyd and LJ Fowler. Studies on heparin degradation I. Preparation of (35S) sulfamate derivatives for studies of heparin degrading enzymes of mammalian origin. *Biochem. Pharmacol.*, (1971) 20, 637-648
- EA Yates, F Santini, M Guerrini, A Naggi, G Torri and B Casu. <sup>1</sup>H and <sup>13</sup>C NMR spectroscopic assignments of twelve systematically modified heparin derivatives, (1996) *Carbohydr. Res.*, 294 15-27
- EA Yates, F Santini, A Bisio and C. Cosentino. Evidence for a heparin derivative containing an N-sulfated aziridine ring that retains high anti factor Xa activity. *Carbohydr. Res.*, (1997) 298, 335-340
- EA Yates, F Santini, B De Cristofano, N Payre, C Cosentino, M Guerrini, A Naggi, G Torri and M Hricovini. Effect of substitution pattern on <sup>1</sup>H and <sup>13</sup>C chemical shifts and <sup>1</sup>JCH coupling constants in heparin derivatives. *Carbohydr. Res.*, (2000) 329, 239-247

## S2. Preparation of modified heparins

Chemically modified polysaccharides were prepared by sequential use of the chemical reactions outlined in **S1**.

Polysaccharides were modified as follows:

**(1) Heparin – unmodified**

**(2) N-acetylated heparin**

- **A** *Selective de-N-sulfation*
- **F** *Re-N-acetylation*

**(3) 2-O-desulfated heparin**

- **B** *Selective 2-O-desulfation*

**(4) 6-O-desulfated heparin**

- **C** *Selective 6-O-desulfation*
- **E** *Re-N-sulfation*

**(5) 2 & 6-O-desulfated heparin**

- **D** *Complete O and N - desulfation*
- **E** *Re-N-sulfation*

**(6) 2-O-desulfated N-acetylated heparin**

- **B** *Selective 2-O-desulfation*
- **A** *Selective de-N-sulfation*
- **F** *Re-N-acetylation*

**(7) 6-O-desulfated N-acetylated heparin**

- **C** *6-O-desulfation and*
- **A** *de-N-sulfation*
- **F** *Re-N-acetylation*

**(8) 2 & 6-desulfated N-acetylated heparin**

- **D** *Complete O and N - desulfation*
- **F** *Re-N-acetylation*

**(9) Per-sulfated heparin**

- **G** *Per-sulfation*
- **E** *Re-N-sulfation*

Compounds were characterized by  $^1\text{H}$  and  $^{13}\text{C}$  NMR (see S4) and in terms of disaccharide compositional analysis by exhaustive digestion with heparinase I, II, and III followed by separation using anion exchange chromatography (Propac PA-1; 4 × 250 mm; Dionex, UK) with identification against known standards (see S3). All modified heparin products were desalted, lyophilized, and resuspended in appropriate buffer prior to bioassay.

### S3. Chemically modified heparin polysaccharide purity

All chemically modified polysaccharides were purified by gel filtration chromatography (Sephadex G-25, GE Healthcare, UK); recovering exclusively the eluate in excess of the column exclusion limit (molecular weight > 5 kDa). All polysaccharides were subsequently treated with cation exchange resin (Dowex, W- 50, Na<sup>+</sup> form, Alfa Aesar, UK) prior to NMR analysis and bioactivity screening.

Gel filtration chromatographic analysis of the modified polysaccharides was performed using a TSK gel G2000SWXL column (7.8 mm x 300 mm, 0.5  $\mu$ m bead; Sigma-Aldrich, UK) eluting isocratically with HPLC grade H<sub>2</sub>O at 1 mL.min<sup>-1</sup>; detection at  $\lambda$  = 190 nm. All polysaccharide samples exhibited a single major peak (> 95 %), with highly comparable retention times (mean, 6.07 minutes,  $\sigma$ n<sup>-1</sup> = 0.05).

Furthermore, all polysaccharides were exhaustively digested with a mixture of bacterial lyase enzymes, heparinase I, II and III, to yield their constituent  $\Delta$ -disaccharides (denoted  $\Delta$ D1 to  $\Delta$ D8). Disaccharides were separated by strong-anion exchange chromatography (Dionex Propac PA-1, UK) and quantified ( $\lambda_{\text{Abs}}$  = 232 nm) with reference to authentic standards (Dextra Laboratories, UK) and showed the following composition (%). In all spectra, unidentified peaks were < 5 % of the total area of the constituents.

| Polysaccharide                             | $\Delta$ D1 | $\Delta$ D2 | $\Delta$ D3 | $\Delta$ D4 | $\Delta$ D5 | $\Delta$ D6 | $\Delta$ D7 | $\Delta$ D8 |
|--------------------------------------------|-------------|-------------|-------------|-------------|-------------|-------------|-------------|-------------|
| 1. Heparin                                 | 6.8         | -           | 3.4         | 13.4        | 7.0         | 67.4        | -           | 2.0         |
| 2. N-acetylated heparin                    | 14.2        | 7.0         | -           | -           | -           | 3.5         | -           | 75.3        |
| 3. 2-O-desulfated heparin                  | 7.1         | -           | 13.7        | 79.2        | -           | -           | -           | -           |
| 4. 6-O-desulfated heparin                  | 15.1        | -           | 43.2        | 7.0         | 34.3        | -           | -           | -           |
| 5. 2 & 6-O-desulfated heparin              | 19.1        | -           | 79.1        | -           | -           | 1.8         | -           | -           |
| 6. 2-O-desulfated N-acetylated heparin     | 14.4        | 92.9        | 3.4         | 19.3        | -           | -           | -           | -           |
| 7. 6-O-desulfated N-acetylated heparin     | 55.8        | 7.7         | -           | -           | -           | -           | 34.8        | 1.7         |
| 8. 2 & 6-O-desulfated N-acetylated heparin | 99.0        | -           | -           | -           | -           | -           | -           | 1.0         |

$\Delta$ D1,  $\Delta$ UA-GlcNAc;  $\Delta$ D2,  $\Delta$ UA-GlcNAc(6S);  $\Delta$ D3,  $\Delta$ UA-GlcNS;  $\Delta$ D4,  $\Delta$ UA-GlcNS(6S);  $\Delta$ D5,  $\Delta$ UA-GlcNS;  $\Delta$ D6,  $\Delta$ UA(2S)-GlcNS(6S);  $\Delta$ D7,  $\Delta$ UA(2S)-GlcNAc;  $\Delta$ D8,  $\Delta$ UA(2S)-GlcNAc(6S)

#### S4. NMR characterisation of chemically modified heparin polysaccharides

$^{13}\text{C}$  and  $^1\text{H}$  NMR characterisation of all chemically modified polysaccharides was performed on a Bruker 400 MHz instrument at 40 °C in  $\text{D}_2\text{O}$ . Structures were confirmed by assignment using a combination of COSY, TOCSY and HMBC 2D spectra.  $^{13}\text{C}$  spectra were obtained using 150 mg of polysaccharide sample. Chemical shift values were obtained relative to a reference standard of trimethylsilylpropionate at 40 °C.

| $^{13}\text{C}$ NMR                              |      |      |      |      |      |      |       |      |      |      |      |
|--------------------------------------------------|------|------|------|------|------|------|-------|------|------|------|------|
|                                                  | A1   | A2   | A3   | A4   | A5   | A6   | I1    | I2   | I3   | I4   | I5   |
| 1. Heparin                                       | 99.5 | 60.7 | 72.5 | 78.8 | 72   | 69.2 | 102.1 | 78.9 | 72.1 | 79.0 | 72.3 |
| 2. N-acetylated heparin                          | 96.6 | 56.2 | 73.0 | 79.3 | 72.3 | 69.6 | 102.2 | 76.8 | 67.3 | 74.2 | 70.8 |
| 3. 2-O-desulfated heparin                        | 98.1 | 60.3 | 72.4 | 80.1 | 71.5 | 68.7 | 104.6 | 71.1 | 70.4 | 77.2 | 71.2 |
| 4. 6-O-desulfated heparin                        | 100  | 60.8 | 72.4 | 80.5 | 73.8 | 62.6 | 102.0 | 77.6 | 70.7 | 78.7 | 71.4 |
| 5. 2 & 6-O-desulfated heparin                    | 98.2 | 60.5 | 72.5 | 80.2 | 73.5 | 62.4 | 104.3 | 72.2 | 71.5 | 77.8 | 72.2 |
| 6. 2-O-desulfated N-acetylated heparin           | 97.1 | 56.2 | 72.5 | 79.6 | 71.8 | 68.8 | 104.6 | 72.0 | 71.4 | 77.0 | 71.9 |
| 7. 6-O-desulfated N-acetylated heparin           | 96.8 | 56.6 | 72.9 | 80.6 | 74.2 | 62.9 | 102.3 | 76.6 | 67.1 | 74.1 | 70.6 |
| 8. 2 & 6-O-desulfated N-acetylated heparin       | 97.1 | 56.2 | 72.3 | 79.6 | 73.7 | 62.3 | 104.3 | 72.5 | 72.2 | 77.3 | 72.6 |
| 9. Per-sulfated heparin (N-acetylated; see note) | 98.2 | 55.4 | 79.6 | 77.2 | 72.4 | 69.3 | 102.0 | 74.4 | 72.7 | 73.2 | 70.6 |

  

| $^1\text{H}$ NMR                                 |      |      |      |      |      |           |      |      |      |      |      |
|--------------------------------------------------|------|------|------|------|------|-----------|------|------|------|------|------|
| Polysaccharide                                   | A1   | A2   | A3   | A4   | A5   | A6        | I1   | I2   | I3   | I4   | I5   |
| 1. Heparin                                       | 5.42 | 3.31 | 3.69 | 3.79 | 4.05 | 4.30-4.42 | 5.23 | 4.37 | 4.22 | 4.14 | 4.82 |
| 2. N-acetylated heparin                          | 5.15 | 4.03 | 3.76 | 3.78 | 4.04 | 4.31-4.37 | 5.2  | 4.37 | 4.31 | 4.08 | 4.91 |
| 3. 2-O-desulfated heparin                        | 5.34 | 3.24 | 3.65 | 3.71 | 4.02 | 4.36-4.23 | 5.04 | 3.78 | 4.12 | 4.08 | 4.84 |
| 4. 6-O-desulfated heparin                        | 5.31 | 3.27 | 3.71 | 3.70 | 3.89 | 3.86-3.88 | 5.26 | 4.35 | 4.25 | 4.06 | 4.84 |
| 5. 2 & 6-O-desulfated heparin                    | 5.39 | 3.26 | 3.67 | 3.72 | 3.87 | 3.84-3.88 | 4.95 | 3.74 | 4.11 | 4.08 | 4.77 |
| 6. 2-O-desulfated N-acetylated heparin           | 5.18 | 4.00 | 3.78 | 3.79 | 4.08 | 4.37-4.26 | 5.01 | 3.75 | 3.42 | 4.10 | 4.78 |
| 7. 6-O-desulfated N-acetylated heparin           | 5.14 | 4.03 | 3.79 | 3.76 | 3.91 | 3.87-3.92 | 5.26 | 4.37 | 4.28 | 4.07 | 4.91 |
| 8. 2 & 6-O-desulfated N-acetylated heparin       | 5.18 | 3.97 | 3.76 | 3.74 | 3.89 | 3.85-3.88 | 4.92 | 3.69 | 3.89 | 4.07 | 4.73 |
| 9. Per-sulfated heparin (N-acetylated; see note) | 5.14 | 4.26 | 4.61 | 4.04 | 4.06 | 4.35-4.40 | 5.38 | 4.56 | 4.79 | 4.35 | 5.14 |

Note:  $^1\text{H}$  interval chemical shift values are stated for the A6 position of glucosamine. Iduronate carbonyl groups and N-acetyl containing glucosamine derivatives  $\text{CH}_3$  groups are not shown.

## S5. Heparin derivatives do not neutralize the VSVg-pseudotyped lentiviral vectors

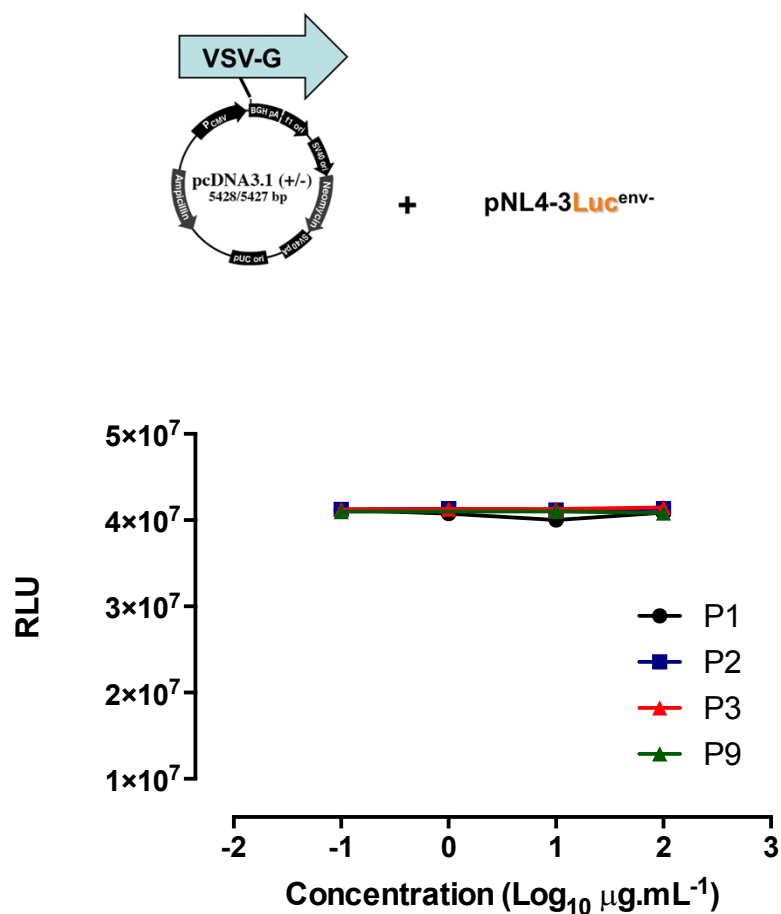

To check that the heparin derivatives are specific for H5-pseudotyped viruses, we tested these compounds at 3 different concentrations against VSVg-pseudotyped viruses, which only differs from H5-VLPs by the composition of the envelope. VSVg-pseudotyped virus was pre-incubated 1:1 with 100  $\mu\text{g/ml}$ , 10  $\mu\text{g/ml}$ , 1  $\mu\text{g/ml}$  and 0.1  $\mu\text{g/ml}$  modified heparin derivatives **P1** (IdoA(2S)-GlcNS(6S)), **P2** (IdoA(2S)-GlcNAc(6S)), **P3** (IdoA-GlcNS(6S)) and **P9** (IdoA(2,3S)-GlcNS(3,6S)) for 30 min at room temperature and added on 293T cells in duplicates.
